# Supplementary material
Source: PubMed Central journal article supplement (PMC3772983)
Supplement: NIHMS507686-supplement-Supp_Fig_S1-S7___Table_S1-S4.pdf [file NIHMS507686-supplement-Supp_Fig_S1-S7___Table_S1-S4.pdf]

# Peptidoglycan hydrolysis is required for assembly and activity of the transenvelope secretion complex during sporulation in *Bacillus subtilis*

Christopher D. A. Rodrigues, Kathleen A. Marquis, Jeffrey Meisner, David Z. Rudner\*

## SUPPLEMENTARY MATERIAL

### Supplementary methods

#### Strain construction

*yrvV::P<sub>hyperspank</sub>-spoIIM (spec)* in BCR299 was obtained by direct transformation of an isothermal assembly product (Gibson, 2011) into *B. subtilis*. The isothermal assembly reaction contained three PCR products: 1) *yrvN (back)-P<sub>hyperspank</sub>* (oligonucleotide primers oCR082 and oCR087 and pCR046 plasmid as template) 2) *optRBS-spoIIM* (oligonucleotide primers oCR090 and oCR091 and PY79 genomic DNA as template) and 3) *lacI-spec-yrvN (front)* (oligonucleotide primers oCR088 and oCR89 and pCR046 as template). pCR046 [*yrvN::P<sub>hyperspank</sub> (spec)*] is an IPTG-inducible expression plasmid for ectopic integration at the *yrvN* locus (C.R. and D.Z.R. unpublished).

#### Plasmid construction

**pKM392** [*ycgO::P<sub>spoIIQ</sub>-optRBS-gfp-spoIIQ (kan)*] was generated in two-way ligation in which a *HindIII-XhoI* fragment containing *gfp* was inserted into pDT68 [*ycgO::P<sub>spoIIQ</sub>-optRBS-cfp-spoIIQ(kan)*] (T.Doan and D.Z.R, unpublished) between *HindIII* and *XhoI*.

**pKM399** [*yhdG::spoIIP, spoIID (spec)*] was generated in a three-way ligation with an *EcoRI-NheI* PCR product containing the *spoIID* gene (oligonucleotide primers oDR065 and oDR810 and PY79 genomic DNA) and a *NheI-BamHI* fragment containing the *spoIIP* gene (oligonucleotide primers oDR0811 and oDR0812 and PY79 genomic DNA) and plasmid pBB278 cut with *EcoRI* and *BamHI*. pBB278 [*yhdG::spec*] is an ectopic integration vector for double-crossover insertions into the *yhdG* gene (B. Burton and DZR, unpublished).

**pLW003** [*yhdG::spolIP<sup>E359A</sup>, spolID<sup>E88A</sup>(spec)*] was generated by site-directed mutagenesis using oligonucleotide primers oDR0821 and oDR0734 and pKM399 plasmid DNA.

**pCR009** [*ycgO::P<sub>spolIQ</sub>-optRBS-gfp-spolIQ<sup>R208A</sup> (kan)*] was generated by site-directed mutagenesis using oligonucleotide primer oCR0029 and plasmid pKM392.

**pCR010** [*ycgO::P<sub>spolIQ</sub>-optRBS-gfp-spolIQ<sup>S164A</sup> (kan)*] was generated by site-directed mutagenesis using oligonucleotide primer oCR0030 and plasmid pKM392.

**pCR011** [*ycgO::P<sub>spolIQ</sub>-optRBS-gfp-spolIQ<sup>V166A</sup> (kan)*] was generated by site-directed mutagenesis using oligonucleotide primer oCR0031 and plasmid pKM392.

**pCR015** [*ycgO::P<sub>spolIQ</sub>-optRBS-gfp-spolIQ<sup>E206A</sup> (kan)*] was generated by site-directed mutagenesis using oligonucleotide primer oCR0033 and plasmid pKM392.

**pCR016** [*ycgO::P<sub>spolIQ</sub>-optRBS-gfp-spolIQ<sup>D123A</sup> (kan)*] was generated by site-directed mutagenesis using oligonucleotide primer oCR0034 and plasmid pKM392.

**pCR017** [*ycgO::P<sub>spolIQ</sub>-optRBS-gfp-spolIQ<sup>S119A</sup> (kan)*] was generated by site-directed mutagenesis using oligonucleotide primer oCR0035 and plasmid pKM392.

**pCR018** [*ycgO::P<sub>spolIQ</sub>-optRBS-gfp-spolIQ<sup>E156A</sup> (kan)*] was generated by site-directed mutagenesis using oligonucleotide primer oCR0036 and plasmid pKM392.

**pCR019** [*ycgO::P<sub>spolIQ</sub>-optRBS-gfp-spolIQ<sup>Q168A</sup> (kan)*] was generated by site-directed mutagenesis using oligonucleotide primer oCR0037 and plasmid pKM392.

**pCR020** [*ycgO*::*P<sub>spoIIQ</sub>-optRBS-gfp-spoIIQ<sup>H202A</sup>* (*kan*)] was generated by site-directed mutagenesis using oligonucleotide primer oCR0032 and plasmid pKM392.

**pCR026** [*ycgO*::*P<sub>spoIID</sub>-mYpet-spoIID* (*spec*)] was generated in two-way ligation with an *EcoRI*-*Bam*HI isothermal assembly product (Gibson, 2011) containing *P<sub>spoIID</sub>-mYpet-spoIID* and pKM083 [*ycgO*::*spec*] cut with *Eco*RI and *Bam*HI. The isothermal assembly product was generated with three PCR products 1) *P<sub>spoIID</sub>* (oligonucleotide primers oDR0065 and oCR0046 and PY79 genomic DNA as template), 2) *mYpet* (oligonucleotide primers oCR0044 and oCR0045 and pROD50 (R. Reyes-Lamothe, unpublished) as template), 3) *spoIID* (oligonucleotide primers oCR47 and oDR0728 and PY79 genomic DNA template). pKM083 [*ycgO*::*spec*] is an ectopic integration vector for double crossover insertions into the *ycgO* locus (K.A.M. and D.Z.R. unpublished).

**pCR027** [*ycgO*::*P<sub>spoIID</sub>-mYpet-spoIID<sup>E88A</sup>* (*spec*)] was generated in two-way ligation with an *Eco*RI-*Bam*HI isothermal assembly product (Gibson, 2011) containing *P<sub>spoIID</sub>-yfp-spoIID<sup>E88A</sup>* and pKM083 [*ycgO*::*spec*] cut with *Eco*RI and *Bam*HI. The isothermal assembly product was generated with three PCR products 1) *P<sub>spoIID</sub>* (oligonucleotide primers oDR0065 and oCR0046 and PY79 genomic DNA as template), 2) *mYpet* (oligonucleotide primers oCR0044 and oCR0045 and pROD50 as template), 3) *spoIID<sup>E88A</sup>* (oligonucleotide primers oCR0047 and oDR0728 and pLW003 plasmid DNA as template).

**pCR028** [*yhdG*::*P<sub>spoIIP</sub>-mYpet-spoIIP<sup>E359A</sup>* (*kan*)] was generated in a two-way ligation with an *Eco*RI-*Bam*HI isothermal assembly product (Gibson, 2011) containing *P<sub>spoIIP</sub>-mYpet-spoIIP<sup>E359A</sup>* and plasmid pCR022 [*yhdG*::*kan*] cut with *Eco*RI and *Bam*HI. The isothermal assembly product was generated with three PCR products 1) *P<sub>spoIIP</sub>* (oligonucleotide primers oCR0040 and oCR0042 and PY79 genomic DNA as template), 2) *mYpet* (oligonucleotide primers oCR0041 and oCR0044 and pROD50 as template), 3) *spoIIP<sup>E359A</sup>* (oligonucleotide primers oCR0043 and oDR0812 and pLW003 plasmid as template). pCR022 [*yhdG*::*kan*]

is an ectopic integration vector for double crossover insertions into the *yhdG* locus (C.R. and D.Z.R, unpublished).

**pCR029** [*yhdG::spolIP<sup>E359A</sup>* (*kan*)] was generated in a two-way ligation with an *NheI-BamHI* fragment containing *spolIP<sup>E359A</sup>* obtained from pLW003 and pBB283 [*yhdG::kan*] cut with *NheI* and *BamHI*. pBB283 [*yhdG::kan*] is an ectopic integration vector for double crossover insertions into the *yhdG* locus (B. Burton and D.Z.R. unpublished).

**pCR030** [*ycgO::spolID<sup>E88A</sup>* (*spec*)] was generated in a two-way ligation with an *NheI-EcoRI* fragment containing *spolID<sup>E88A</sup>* obtained from pLW003 and plasmid pKM083 [*ycgO::spec*] cut with *NheI* and *EcoRI*.

**pCR035** [*His-SUMO-sfGFP-spolIQ<sup>ECD</sup>*] was generated in a two-way ligation with a *BamHI-HindIII* PCR product containing the extracytoplasmic domain of *spolIQ* (oligonucleotide primers oCR0059 and oCR0060 and PY79 genomic DNA as template) and plasmid pTB260 (His-SUMO-GFP) cut with *BamHI* and *HindIII*. pTB260 (His-SUMO-GFP) is an expression vector for production of GFP-tagged purified proteins (T. Bernhardt, unpublished).

**pCR037** [*ycgO::spolIQ<sup>Q168A</sup>* (*kan*)] was generated by site-directed mutagenesis using oligonucleotide primer oCR0037 and plasmid pDT139 [*ycgO::spolIQ* (*kan*)] (T. Doan and D.Z.R, unpublished).

**pCR041** [*ycgO::P<sub>spolIQ</sub>-optRBS-mCherry(B.s)-spolIQ* (*cat*)] was generated in a two-way ligation with an *XhoI-HindIII* PCR product containing *mCherry* (oligonucleotide primers oCR0073 and oCR0074 and pDR201 plasmid as template) and plasmid pCR007 [*ycgO::P<sub>spolIQ</sub>-optRBS-GFP-spolIQ* (*cat*)] cut with *XhoI* and *HindIII*. pDR201 contains *mCherry* with codons optimized for *B. subtilis* (D.Z.R. unpublished). pCR007 [*ycgO::P<sub>spolIQ</sub>-optRBS-GFP-spolIQ* (*cat*)] was generated in a two-way ligation with an *EcoRI-BamHI* fragment from pKM392 and pKM077. pKM077 [*ycgO::cat*] is an ectopic integration vector for

double crossover integrations into the *ycgO* locus (K.A.M. and D.Z.R, unpublished).

**pCR046** [*yvrN::P<sub>hyperspank</sub> (spec)*] was generated by isothermal assembly with *P<sub>hyperspank</sub>-MCS-lacI* (oligonucleotide primers oCR0061 and oCR0062 and plasmid pER067 DNA as template) and pWX110 [*yvrN::spec*] digested with *Bam*HI and *Hind*III. pER067 is an ectopic integration vector containing a multiple cloning site downstream of the *P<sub>hyperspank</sub>* promoter (E. Riley and D.Z.R, unpublished). pWX110 is an ectopic integration vector for double cross-over at the *yvrN* locus (X. Wang and D.Z.R, unpublished).

**pCR047** [*pelB::P<sub>hyperspank</sub>-optRBS-spolIID (cat)*] was generated in a two-way ligation with an *Xma*I-*Sph*I PCR product containing *spolIID* (oligonucleotide primers oCR0075 and oCR0076 and PY79 genomic DNA) and plasmid pCR044 [*pelB::P<sub>hyperspank</sub> (cat)*]. pCR044 was generated in a two-ligation with an *Eco*RI-*Bam*HI fragment from pER067 [*ycgO::P<sub>hyperspank</sub> (erm)*] and pKM020 [*pelB::cat*]. pKM020 [*pelB::cat*] is an ectopic integration vector for double crossover integrations into the *pelB* locus (K. A. M. and D.Z.R, unpublished).

**pCR050** [*His-SUMO-sfGFP-spolIQ<sup>ECD(H202A H204A)</sup>*] was generated in a two-way ligation with a *Bam*HI-*Hind*III PCR product containing the extracytoplasmic domain of *spolIQ<sup>H202A H204A</sup>* (oligonucleotide primers oCR0059 and oCR0060 and pCR021 plasmid as template) and plasmid pTB260 (His-SUMO-GFP) cut with *Bam*HI and *Hind*III. pCR021 is an ectopic integration vector for double crossover integration at the *ycgO* locus that contains GFP-SpolIQ<sup>H202A H204A</sup> (C.R. and D.Z.R, unpublished).

**pCR052** [*ykoW::P<sub>hyperspank</sub>-optRBS-spolIIP (phleo)*] was generated in a two-way ligation with a *Hind*III-*Nhe*I PCR product containing *spolIIP* (oligonucleotide primers oCR94 and oCR78 and PY79 genomic DNA) and plasmid pCR051 [*ykoW::P<sub>hyperspank</sub> (phleo)*]. pCR051 was generated by two-way ligation with an *Eco*RI-*Bam*HI fragment from pER067 and pWX112 [*ykoW::phleo*] cut with *Eco*RI

and *Bam*HI. pWX112 is a an ectopic integration vector for double crossover integrations into the *ykoW* locus (X. Wang and D.Z.R, unpublished).

### **Protein purification**

His-SpoIID, His-SpoIIP and His-SpoIIQ were purified as described previously (Morlot *et al.*, 2010). Purified His-EnvC<sup>35-419</sup> was a gift from T. Uehara and T. Bernhardt.

GFP-SpoIIQ<sup>ECD</sup>, GFP-SpoIIQ<sup>ECD(H202A H204A)</sup>, and GFP-EnvC<sup>35-419</sup> fusion proteins were expressed in *E. coli* BL21(DE3), as His-SUMO tagged proteins (Bendezu *et al.*, 2009) following the procedure described in Uehara *et al.*, 2010 (Uehara *et al.*, 2010). All purification steps were carried out at 4°C. Cells were grown in 1 L LB supplemented with ampicillin (50 mg/mL) and 0.04% glucose at 37°C to an OD600 of 0.6. Protein overproduction was induced by the addition of IPTG to 1 mM. The cells were harvested (after 2.5 h) by centrifugation and resuspended in 12 ml of buffer A (50 mM Tris-HCl at pH 8, 300 mM NaCl, 20 mM imidazole, 10% glycerol). The cells were lysed by two passages through a French pressure cell. A soluble fraction was prepared by a 100,000Xg spin and was loaded on a 5-mL HisPur Ni-NTA spin column (Thermo Scientific) equilibrated with buffer A. Bound protein was washed with buffer B (20 mM Tris-HCl at pH 8, 300 mM NaCl, 50 mM imidazole, 10% glycerol) and eluted in buffer C (20 mM Tris-HCl at pH 8, 300 mM NaCl, 300 mM imidazole, 10% glycerol). Elution fractions were dialyzed overnight in buffer D (20 mM Tris-HCl at pH 8, 300 mM NaCl, 10% glycerol) using a Slide-A-Lyzer cassette (7-kDa cutoff, Thermo Scientific). The SUMO protease, Ulp1, was added prior to dialysis. The dialyzed material was passed through HisPur Ni-NTA spin columns to remove free His-SUMO and His-Ulp1 yielding a pure preparation of the desired protein. The buffer was exchanged using Millipore filter units (10-kDa cutoff) into buffer E [(20 mM Tris-HCl (pH 8), 150 mM NaCl, and 10% glycerol)]. Protein concentration was determined by Coomassie Plus protein reagent protocol (Thermo Scientific) and SDS-PAGE followed by Coomassie staining.

### **Preparation of *B. subtilis* sacculi**

Vegetative and sporulating sacculi from the *B. subtilis* prototrophic strain PY79 were purified as described previously (McPherson & Popham, 2003), with some modifications. For vegetatively-growing cells, 200 mL of cells grown in CH medium were harvested at an OD600 of 0.5, resuspended in 10 ml ddH<sub>2</sub>O and boiled in 40 mL of 5% SDS with vigorous stirring for 30 min. Sacculi were then harvested by centrifugation (8000g, 6 min, room temperature) and washed eight times with ddH<sub>2</sub>O to remove SDS. Isolated sacculi were treated with ~ 1000 units of Benzonase (Sigma-Aldrich) for 24 h at 37°C in 1 ml buffer T (100 mM Tris HCl at pH 7.5, 20 mM MgSO<sub>4</sub>) with vigorous agitation. Sacculi were then harvested by centrifugation (8000g, 6 min, room temperature) and resuspended in 1 ml buffer T containing 10 mM CaCl<sub>2</sub> and 100 mg/mL trypsin (Worthington Biochemical) and incubated overnight at 37°C. The sacculi were boiled again in 1% SDS for 15 min, diluted in 7 mL of ddH<sub>2</sub>O, and centrifuged at 12,000g for 10 min at room temperature. The pelleted sacculi were then washed twice in 20 mL of ddH<sub>2</sub>O, once in 20 mL of 8 M LiCl, and twice again in 20 mL of ddH<sub>2</sub>O. The pellet was then incubated in 2 ml 10% TCA with constant rocking at 4°C for 48 h, after which the pellet was washed by centrifugation (8000g) with ddH<sub>2</sub>O. The pellet was then resuspended in 1 ml alkaline phosphatase buffer with 5 units of alkaline phosphatase (calf intestinal, Boehringer Mannheim) and incubated overnight at 37°C. The pellet was boiled for 5 min and washed by centrifugation in ddH<sub>2</sub>O three times. The final pellet was resuspended in 2 mL of ddH<sub>2</sub>O containing 0.02% sodium azide and stored at 4°C.

Sporulating cells (100 mL) were harvested at hour 2 after transfer to resuspension medium and prepared as above.

### **Preparation of *E. coli* sacculi**

Sacculi were prepared from strain TU163 [ $\Delta/pp$ ] as described by Uehara et al. (Uehara *et al.*, 2009).

### **Peptidoglycan pull-down assay**

The extracellular domains of purified proteins were incubated separately with (+PG) and without (-PG) sacculi from *B. subtilis* (saculi of vegetatively-growing or sporulating cells) or *E. coli* in a 100  $\mu$ L reaction mix. The reaction mix contained 4  $\mu$ M of purified protein and 10  $\mu$ L of purified sacculi. When sacculi was absent, an identical amount of 1XPBS buffer was added. Reactions were incubated for 30 min at 37°C. All reactions were then centrifuged at 13000g for 5 min to pellet the sacculi, after which 90  $\mu$ L of supernatant was carefully removed and kept aside. This procedure was performed even in the sample that did not contain sacculi. The 10  $\mu$ L pellet fraction was then resuspended in 90  $\mu$ L 1XPBS. SDS-page sample buffer was added to the pellet fraction and the supernatant fraction to a final volume of 200  $\mu$ L. Each fraction (20  $\mu$ L) was separated by SDS-PAGE and stained with Coomassie.

For the assay containing sacculi pre-digested by SpoIID, SpoIIP or both, the sacculi (20  $\mu$ L) were digested for 30 min at 37°C in 200  $\mu$ L 1XPBS containing 1  $\mu$ M of each protein. After 30 min, the reactions were quenched by boiling the samples for 5 min. The pre-digested sacculi were then pelleted by centrifugation at 13000 g for 5 min, and the pellet was used in the pull-down assay described above.

### **Visualization of purified GFP-tagged proteins on sacculi**

For the visualization of GFP proteins on purified sacculi, 4  $\mu$ M of protein was incubated with 1  $\mu$ L of purified sacculi in a final volume of 10  $\mu$ L 1XPBS at room temperature for 15 min. The sample was then centrifuged at 13000g for 5 min, 5  $\mu$ L of supernatant were removed and an equal volume of 1XPBS was added to the remaining 5  $\mu$ L; the mixture was mixed and the above repeated three times to remove unbound protein. 5  $\mu$ L of the washed sample were applied to poly L-lysine-coated slides and imaged as described in the Materials and Methods.



## SUPPLEMENTAL FIGURE LEGENDS

**Figure S1: Localization of GFP-SpoIIQ to the septal membrane requires SpoIID, SpoIIP and SpoIIAH.** Representative images of GFP-SpoIIQ localization in sporulating cells at hour 2 of sporulation. Images are from a  $\Delta spoIID \Delta spoIIP$  double mutant (BKM1898), a  $\Delta spoIID \Delta spoIIP \Delta spoIIAH$  triple mutant (BKM1929), and  $\Delta sigE$  (BKM1930). Sporulating cells that have uniformly localized GFP-SpoIIQ throughout the forespore membranes (yellow carets) and those that have retained some localization GFP-SpoIIQ at the forespore septal membrane (white carets) are highlighted. We note that in a small subset of  $\Delta sigE$  mutants, some GFP-SpoIIQ localized as a focus that could be found in either the septal membranes or the peripheral membranes. Images are GFP-SpoIIQ (left) and merge of GFP-SpoIIQ with membranes stained with TMA-DPH. Scale bar is 2  $\mu\text{m}$ .

**Figure S2: mCherry-SpoIIQ localizes in the wake of GFP-SpoIID and GFP-SpoIIP.** Double labeling of mCherry-SpoIIQ and GFP-SpoIID (or GFP-SpoIIP) in sporulating cells (BCR189 or BCR188) imaged at hour 2 of sporulation. (A) Representative fields showing mCherry-SpoIIQ, GFP-SpoIID, a merged image of the two fluorescent fusion proteins and a merged image including the membranes stained with TMA-DPH (left). Larger images highlighting examples where mCherry-SpoIIQ and GFP-SpoIID do not completely overlap (right). Schematic representations of mCherry-SpoIIQ (red), GFP-SpoIID (green) and membranes (blue) are shown below. Scale bar is 2  $\mu\text{m}$ . We note that mCherry-SpoIIQ localization is slightly delayed compared to GFP-SpoIIQ. We attribute this lag to the maturation time of the mCherry compared to GFP (Cormack *et al.*, 1996, Shaner *et al.*, 2005, Merzlyak *et al.*, 2007). (B) Larger representative images of mCherry-SpoIIQ and GFP-SpoIIP (top) and mCherry-SpoIIQ and GFP-SpoIID (bottom).

**Figure S3: The extracytoplasmic domain of SpoIIQ does not bind peptidoglycan.** Biochemical and cytological assays probing the interaction of SpoIIQ with purified peptidoglycan. (A) The extracytoplasmic domain of SpoIIQ

fused to superfolder GFP (sfGFP) (sfGFP-SpoIIQ<sup>ECD</sup>) was purified and tested for binding to purified sacculi from sporulating and vegetatively grown *B. subtilis* cells. No interaction was observed by fluorescence microscopy. Scale bar is 2  $\mu\text{m}$ . **(B)** The purified extracytoplasmic domain of SpoIIQ (lacking GFP) (IIQ<sup>ECD</sup>) also failed to co-pellet (P) with *B. subtilis* sacculi. **(C)** Purified sfGFP-SpoIIQ and a mutant (sfGFP-SpoIIQ<sup>H202A H204A</sup>), in which two highly conserved histidines in the LytM domain that have been implicated in PG binding in other LytM proteins (Sabala *et al.*, 2012) were mutated to alanine, displayed insignificant binding to *E. coli* sacculi. By contrast, labeling of *E. coli* sacculi by sfGFP-EnvC<sup>34-419</sup> was readily detectable. **(D)** Purified EnvC<sup>34-419</sup> but not the extracytoplasmic domain of SpoIIQ co-pelleted with *E. coli* sacculi. **(E)** The extracytoplasmic domain of SpoIIQ did not pellet with *E. coli* sacculi that were pre-treated with purified SpoIID and/or SpoIIP. These observations are consistent with those of Meisner and Moran (Meisner & Moran, 2011) who also failed to detect binding of SpoIIQ to purified sacculi.

**Figure S4: Point mutants in the LytM groove of SpoIIQ impair its localization to the forespore septal membrane.** (A) Surface representation of the SpoIIQ crystal structure highlighting the SpoIIAH-SpoIIQ interaction interface (cyan), the degenerate active site (magenta) and the characteristic LytM groove (yellow). Residues that were mutated are highlighted. **(B)** Representative images of GFP-SpoIIQ mutants in a *spoIIAH* null background at hour 2 of sporulation. From top to bottom, GFP-SpoIIQ<sup>D123A</sup> (BCR77), GFP-SpoIIQ<sup>R208A</sup> (BCR70), GFP-SpoIIQ<sup>H202A</sup> (BCR81), GFP-SpoIIQ<sup>E206A</sup> (BCR76), GFP-SpoIIQ<sup>E156A</sup> (BCR79), GFP-SpoIIQ<sup>S119A</sup> (BCR78) and GFP-SpoIIQ<sup>V166A</sup> (BCR72). Images are GFP-SpoIIQ (left) and merge with TMA-DPH stained membranes (right). Scale bar is 2  $\mu\text{m}$ .

**Figure S5: Loss of GFP-SpoIIQ compartmentalization in a subset of cells expressing SpoIID, SpoIIP, and SpoIIM.** Representative images of cells (strain BCR299) at hour 2 of sporulation from cultures with (+IPTG) and without (-IPTG) inducer added at hour 1.5. In a subset of sporulating cells in which IPTG was

added, GFP-SpoIIQ was present in both mother-cell and forespore membranes (white carets). It is not clear what accounts for this loss of forespore-specific compartmentalization but is likely related to the timing and/or extent of SpoIID, SpoIIP, and SpoIIM expression. Images are TMA-DPH-stained membranes (left), GFP-SpoIIQ (middle) and a merge (right). Scale bar is 2  $\mu\text{m}$ .

**Figure S6: The interaction mediated by the LytM groove in SpoIIQ is required for  $\sigma^G$  activity.** Representative images of strains harboring the  $\sigma^G$  activity reporter  $P_{sspB}$ -*cfp* fluorescent-reporter. From top to bottom: wild-type (BCR185),  $\Delta$ *spoIIQ* (BCR151),  $\Delta$ *spoIIAH* (BCR193), *spoIIQ*(Q168A) (BCR186) and a  $\Delta$ *spoIIAH spoIIQ*(Q168A) double mutant (BCR191). Forespores that display  $\sigma^G$  activity and are scored as positive (yellow carets) and those with weak activity and a collapsed forespore that are scored as negative (white carets) are highlighted (see Experimental Procedures). Images are CFP-SpoIIQ (left) and merge with TMA-DPH stained membranes (right). Scale bar is 2  $\mu\text{m}$ .

**Figure S7: Septal peptidoglycan thinning by SpoIID and SpoIIP is required for  $\sigma^G$  activity.** Representative images of strains harboring the  $\sigma^G$  activity reporter  $P_{sspB}$ -*cfp* fluorescent-reporter. From top to bottom: wild-type (BTD2583),  $\Delta$ *spoIID* (BTD2607),  $\Delta$ *spoIIP* (BCR527), and a  $\Delta$ *spoIID \Delta**spoIIP* double mutant (BCR529). Images are CFP (left) and merge with TMA-DPH-stained membranes (right). Scale bar is 2  $\mu\text{m}$ .

## SUPPLEMENTARY REFERENCES

Bendezu, F. O., C. A. Hale, T. G. Bernhardt & P. A. de Boer, (2009) RodZ (YfgA) is required for proper assembly of the MreB actin cytoskeleton and cell shape in *E. coli*. *EMBO J* **28**: 193-204.

Cormack, B. P., R. H. Valdivia & S. Falkow, (1996) FACS-optimized mutants of the green fluorescent protein (GFP). *Gene* **173**: 33-38.

Gibson, D. G., (2011) Enzymatic assembly of overlapping DNA fragments. *Methods Enzymol* **498**: 349-361.

McPherson, D. C. & D. L. Popham, (2003) Peptidoglycan synthesis in the absence of class A penicillin-binding proteins in *Bacillus subtilis*. *J Bacteriol* **185**: 1423-1431.

Meisner, J. & C. P. Moran, Jr., (2011) A LytM domain dictates the localization of proteins to the mother cell-forespore interface during bacterial endospore formation. *J Bacteriol* **193**: 591-598.

Merzlyak, E. M., J. Goedhart, D. Shcherbo, M. E. Bulina, A. S. Shcheglov, A. F. Fradkov, A. Gaintzeva, K. A. Lukyanov, S. Lukyanov, T. W. Gadella & D. M. Chudakov, (2007) Bright monomeric red fluorescent protein with an extended fluorescence lifetime. *Nat Methods* **4**: 555-557.

Morlot, C., T. Uehara, K. A. Marquis, T. G. Bernhardt & D. Z. Rudner, (2010) A highly coordinated cell wall degradation machine governs spore morphogenesis in *Bacillus subtilis*. *Genes Dev* **24**: 411-422.

Sabala, I., I. M. Jonsson, A. Tarkowski & M. Bochtler, (2012) Anti-staphylococcal activities of lysostaphin and LytM catalytic domain. *BMC Microbiol* **12**: 97.

Shaner, N. C., P. A. Steinbach & R. Y. Tsien, (2005) A guide to choosing fluorescent proteins. *Nat Methods* **2**: 905-909.

Uehara, T., T. Dinh & T. G. Bernhardt, (2009) LytM-domain factors are required for daughter cell separation and rapid ampicillin-induced lysis in *Escherichia coli*. *J Bacteriol* **191**: 5094-5107.

Uehara, T., K. R. Parzych, T. Dinh & T. G. Bernhardt, (2010) Daughter cell separation is controlled by cytokinetic ring-activated cell wall hydrolysis. *EMBO J* **29**: 1412-1422.

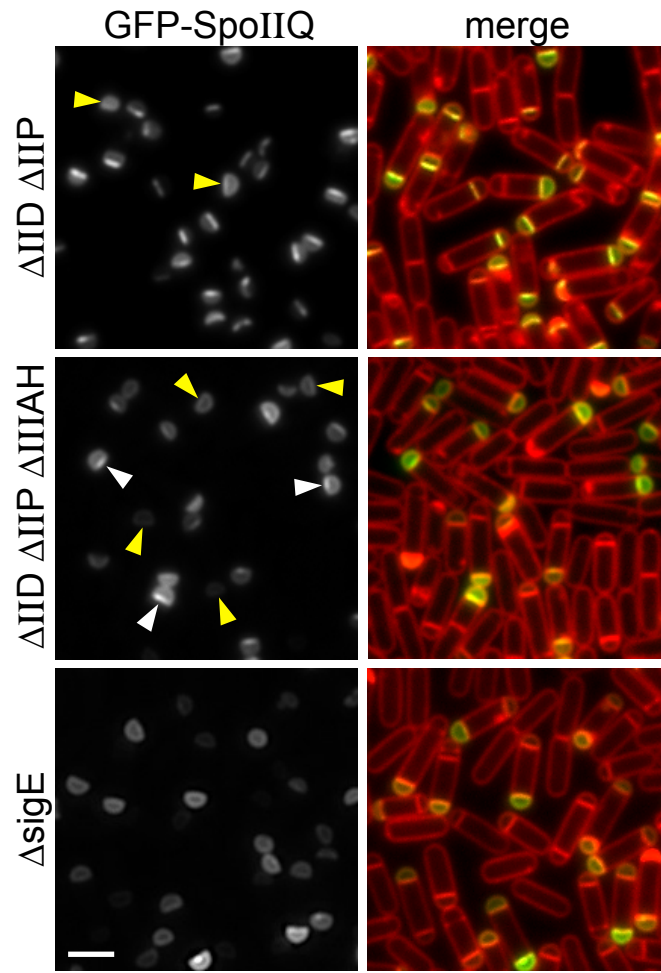

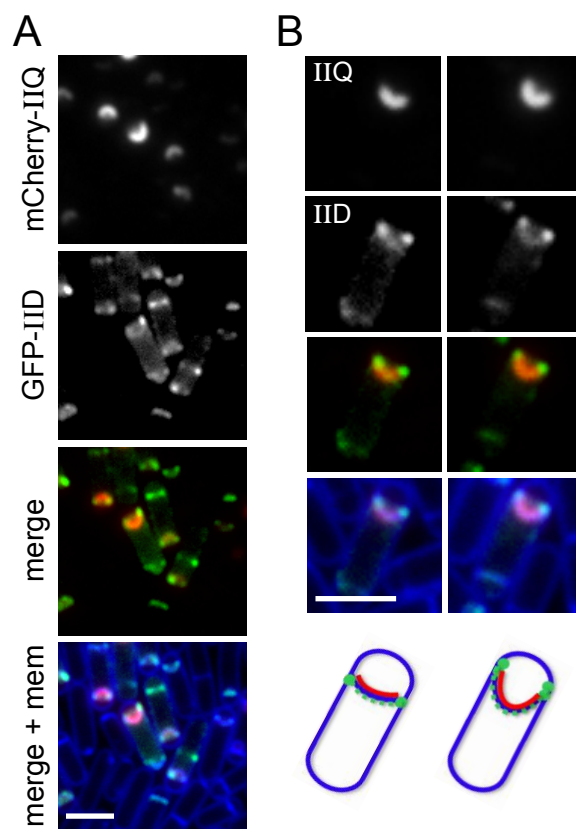

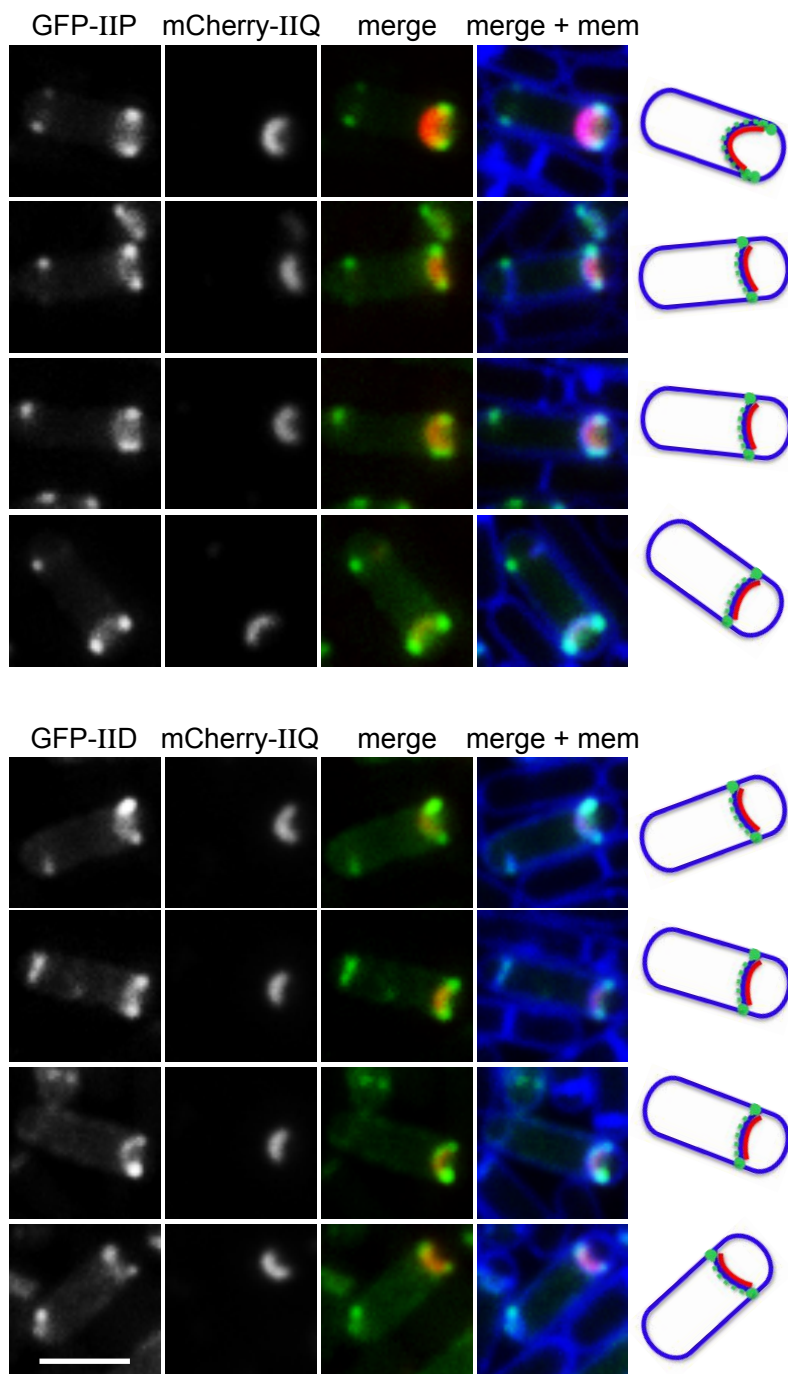

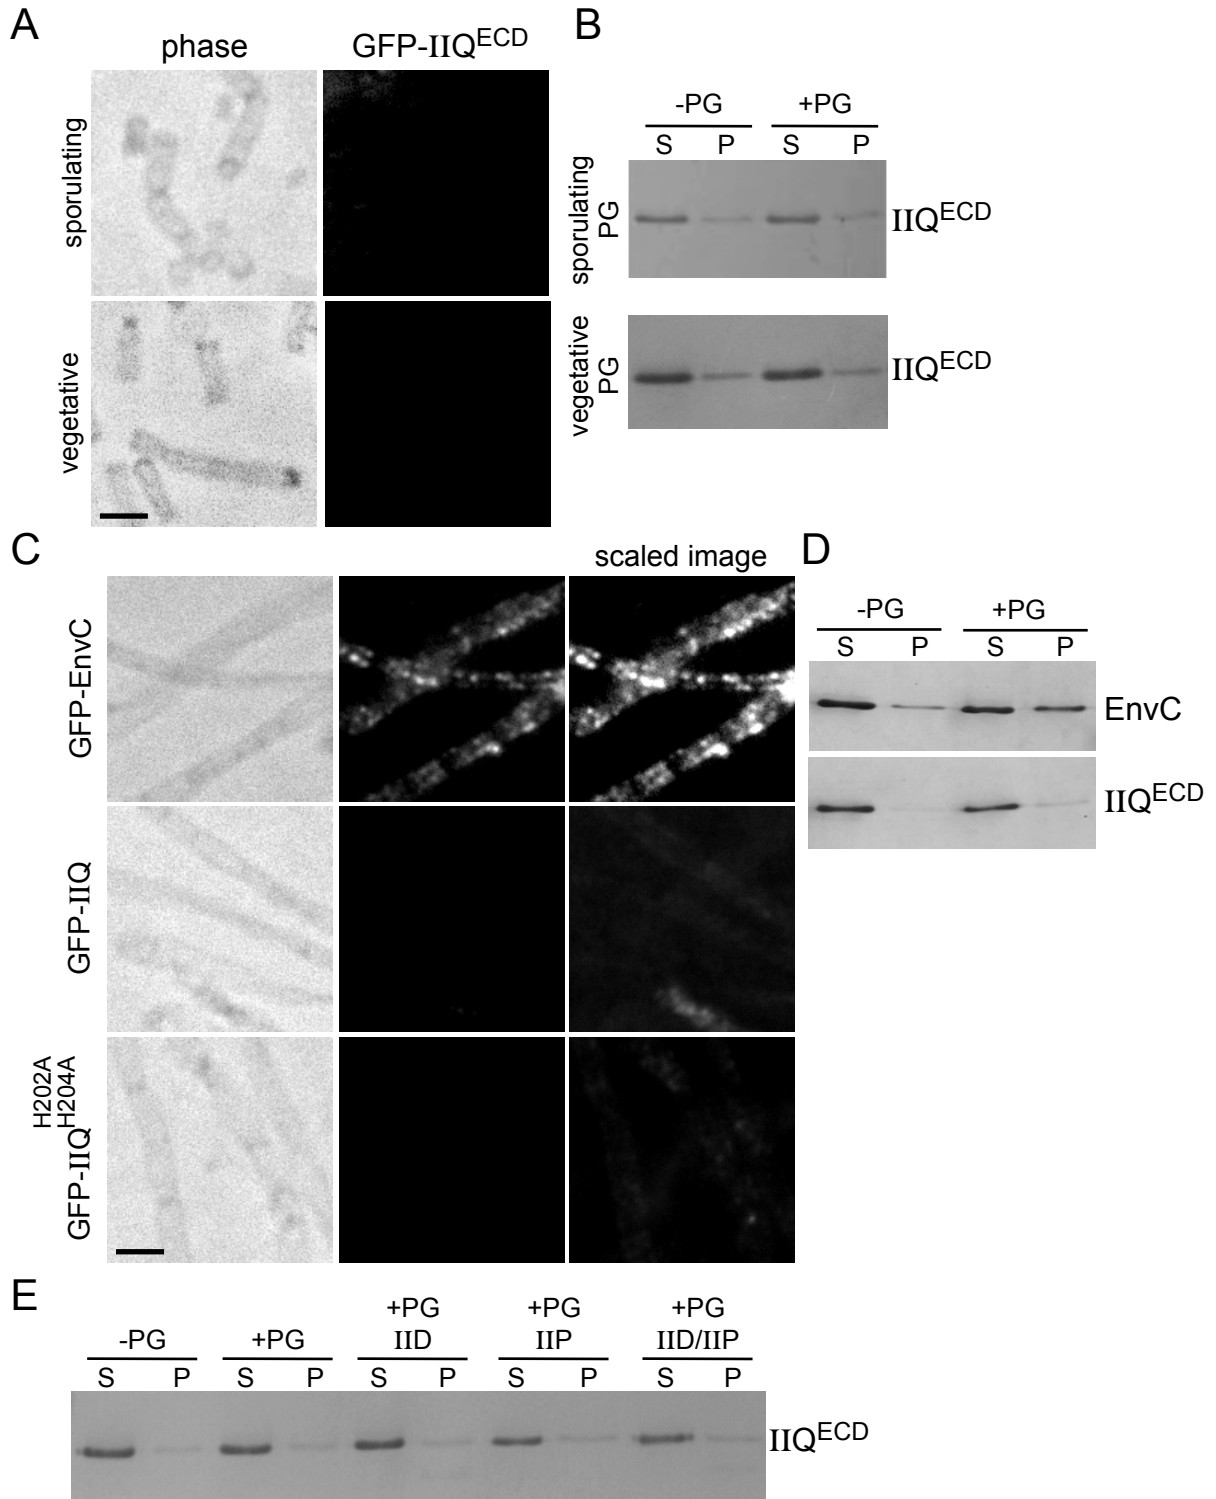



A

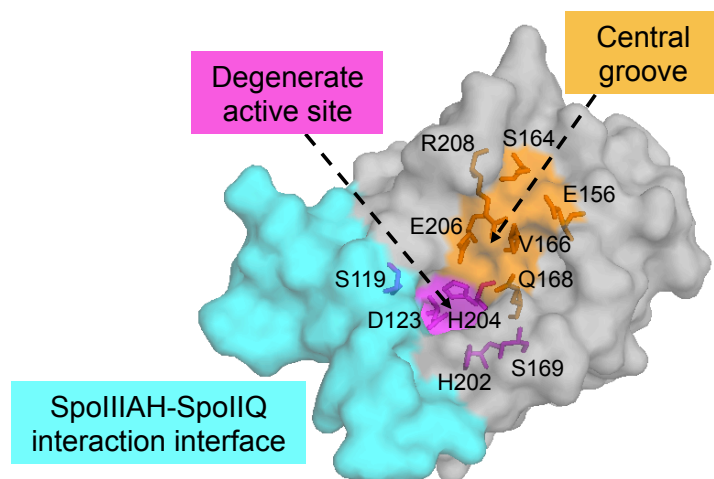

B

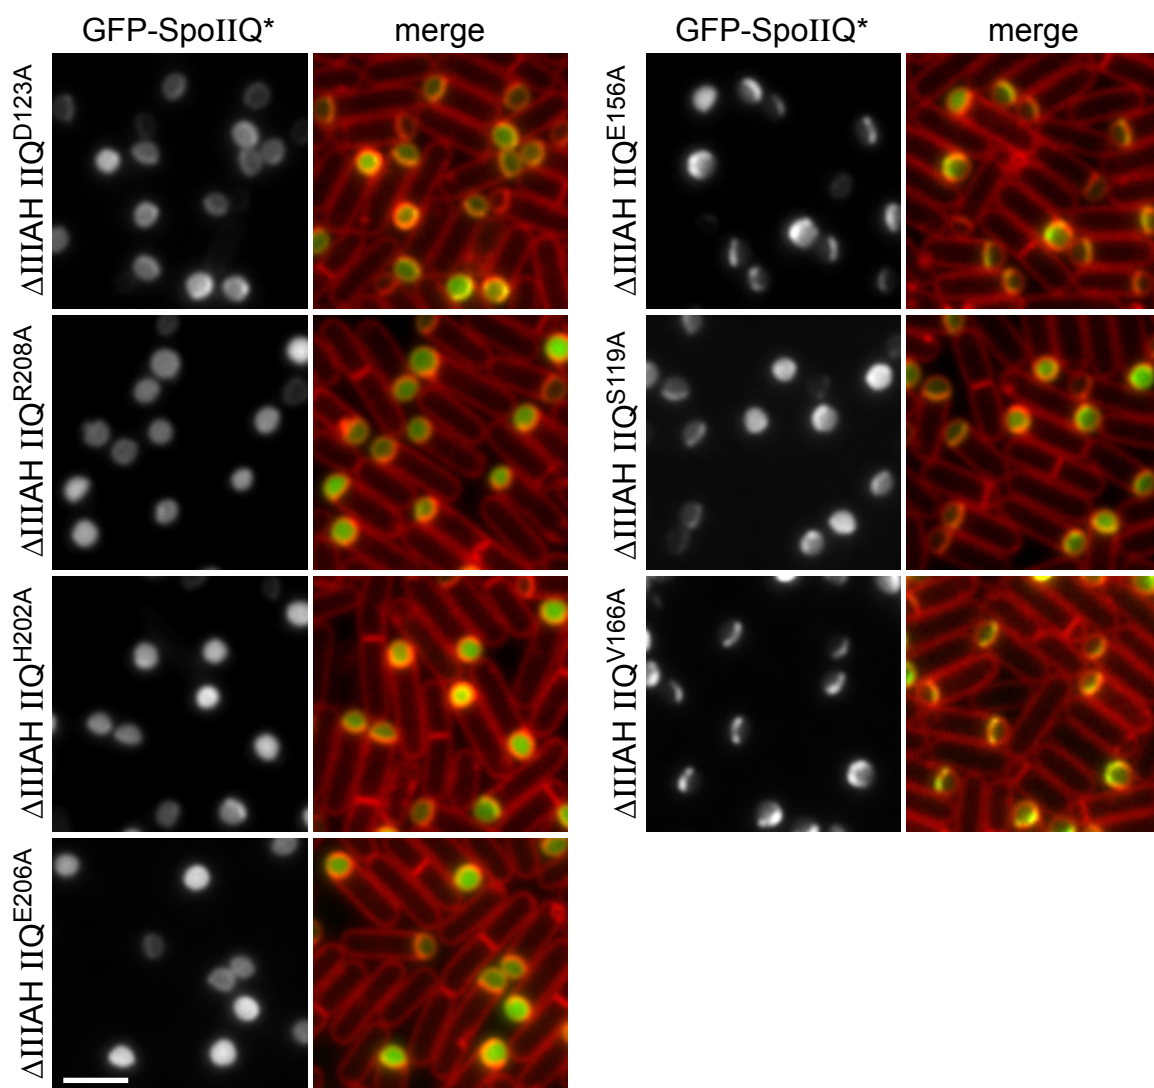

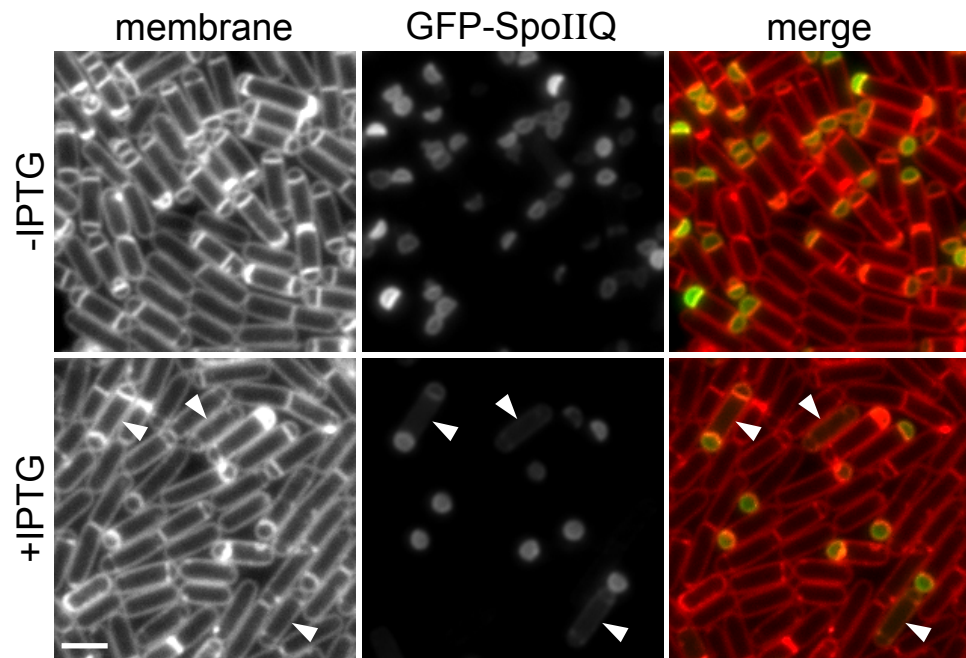

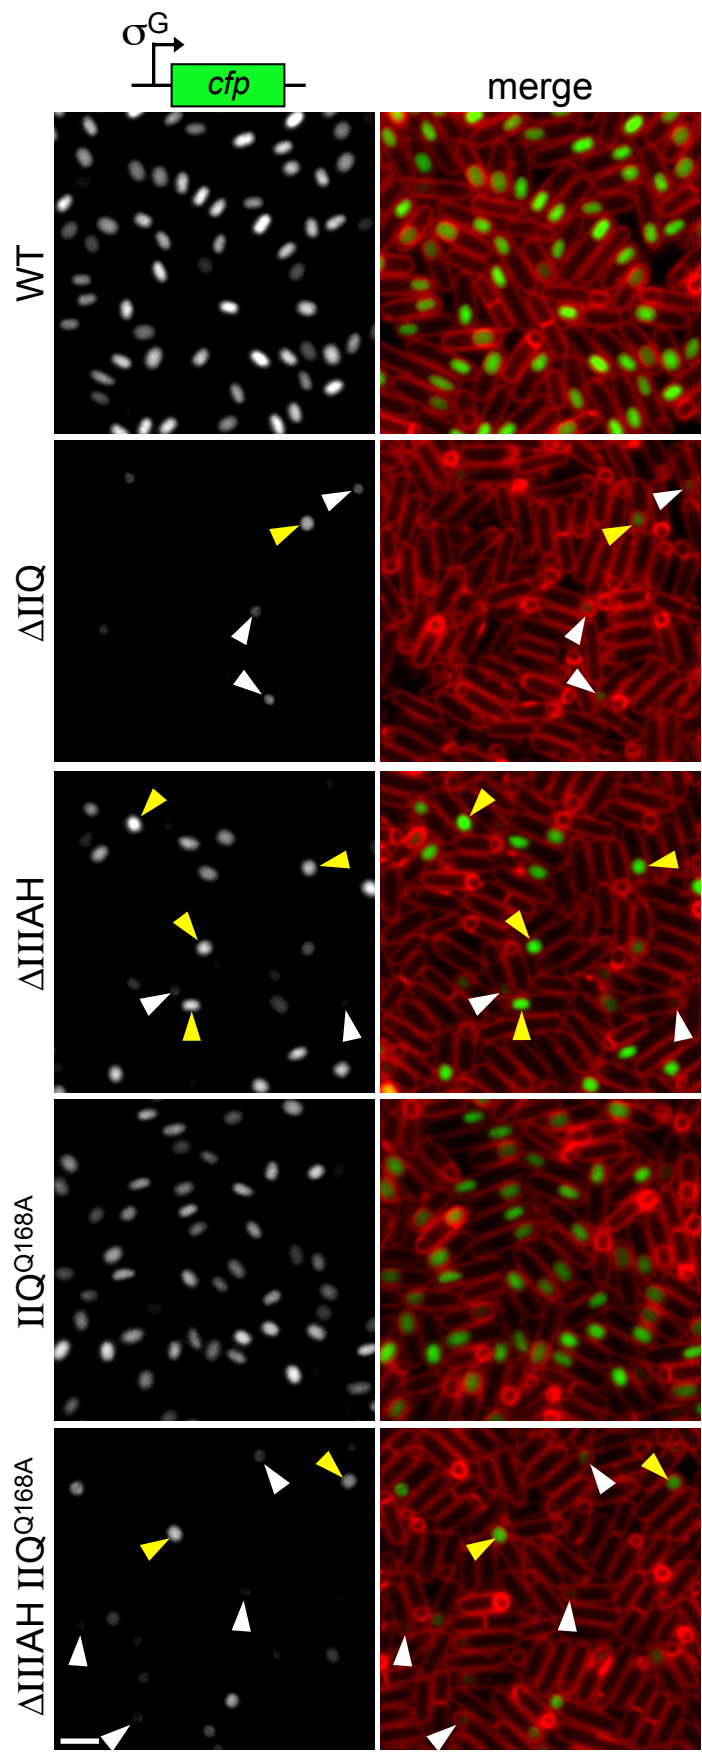

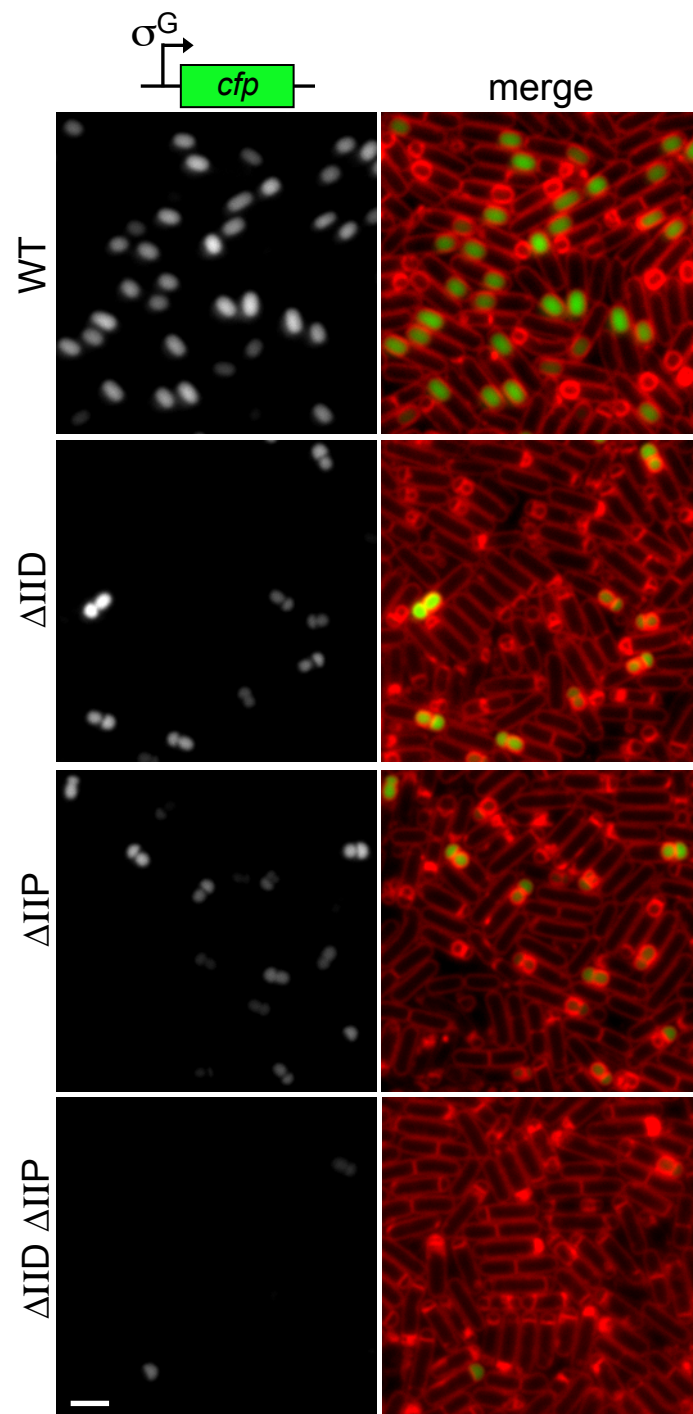

**TABLE S1: Sporulation Efficiency**

| Strain         | Genotype                                                  | Total<br>CFU | Heat-resistant<br>CFU | Spores/CFU<br>(%) | Spores/WT<br>(%) |
|----------------|-----------------------------------------------------------|--------------|-----------------------|-------------------|------------------|
| <b>BCR163</b>  | WT                                                        | 3.9E+08      | 3.20E+08              | 82                | 100              |
| <b>BTD1541</b> | $\Delta$ <i>spolIQ</i>                                    | 6.5E+07      | 1.0E+05               | 0.2               | 0.03             |
| <b>BCR152</b>  | <i>spolIQ</i> <sup>Q168A</sup>                            | 4.1E+08      | 3.0E+08               | 73                | 94               |
| <b>BCR161</b>  | $\Delta$ <i>spolIIAH</i>                                  | 5.6E+07      | 6.2E+06               | 11                | 2                |
| <b>BCR153</b>  | $\Delta$ <i>spolIIAH</i> , <i>spolIQ</i> <sup>Q168A</sup> | 5.8E+07      | 1.1E+05               | 0.2               | 0.03             |
| <b>BCR162</b>  | $\Delta$ <i>spolIB</i>                                    | 2.4E+08      | 1.9E+08               | 79                | 59               |
| <b>BCR196</b>  | $\Delta$ <i>spolIB</i> , <i>spolIQ</i> <sup>Q168A</sup>   | 1.7E+08      | 1.6E+08               | 94                | 50               |

TABLE S2: *B. subtilis* strains used in this study

| strain  | genotype                                                                                                                                                                                                                                                                                                       | source                      |
|---------|----------------------------------------------------------------------------------------------------------------------------------------------------------------------------------------------------------------------------------------------------------------------------------------------------------------|-----------------------------|
| PY79    | Prototrophic wild-type strain                                                                                                                                                                                                                                                                                  | Youngman, 1983              |
| ABS49   | <i>spolIP::tet</i> $\Omega$ <i>PspolIP-gfp-spolIP</i> ( <i>erm</i> )                                                                                                                                                                                                                                           | Chastanet & Losick, 2007    |
| ABS325  | <i>spolID::kan</i> $\Omega$ <i>PspolID-gfp-spolID</i> ( <i>erm</i> )                                                                                                                                                                                                                                           | Chastanet & Losick, 2007    |
| AHB1158 | $\Delta$ <i>spolIIAH::erm</i>                                                                                                                                                                                                                                                                                  | Gift from A. Camp           |
| KP977   | $\Delta$ <i>spolIP::tet</i>                                                                                                                                                                                                                                                                                    | Gift from K. Pogliano       |
| RL324   | $\Delta$ <i>spolID::cat</i>                                                                                                                                                                                                                                                                                    | Gift from R. Losick         |
| RL873   | $\Delta$ <i>spolIB::erm</i>                                                                                                                                                                                                                                                                                    | Margolis et al., 1993       |
| RL2022  | $\Delta$ <i>spolIQ::spec</i>                                                                                                                                                                                                                                                                                   | Londono-Vallejo et al, 1997 |
| RL2036  | $\Delta$ <i>spolIIA::erm</i>                                                                                                                                                                                                                                                                                   | Gift from R. Losick         |
| BTD1541 | $\Delta$ <i>spolIQ::phleo</i>                                                                                                                                                                                                                                                                                  | Doan et al., 2009           |
| BTD2583 | <i>yycR::P<sub>sspE</sub>-optRBS-cfp</i> ( <i>phleo</i> )                                                                                                                                                                                                                                                      | Doan et al., 2009           |
| BTD2607 | <i>yycR::P<sub>sspE</sub>-optRBS-cfp</i> ( <i>phleo</i> ), $\Delta$ <i>spolID::cat</i>                                                                                                                                                                                                                         | Doan et al., 2009           |
| BLW2    | $\Delta$ <i>spolIQ::phleo</i> , <i>ycgO::P<sub>spolIQ</sub>-optRBS-gfp-spolIQ</i> ( <i>kan</i> ), $\Delta$ <i>spolIP::tet</i>                                                                                                                                                                                  | This work                   |
| BKM1897 | $\Delta$ <i>spolIQ::phleo</i> , <i>ycgO::P<sub>spolIQ</sub>-optRBS-gfp-spolIQ</i> ( <i>kan</i> )                                                                                                                                                                                                               | This work                   |
| BKM1898 | $\Delta$ <i>spolIQ::phleo</i> , <i>ycgO::P<sub>spolIQ</sub>-optRBS-gfp-spolIQ</i> ( <i>kan</i> ), $\Delta$ <i>spolID::cat</i>                                                                                                                                                                                  | This work                   |
| BKM1902 | $\Delta$ <i>spolIQ::phleo</i> , <i>ycgO::P<sub>spolIQ</sub>-optRBS-gfp-spolIQ</i> ( <i>kan</i> ), <i>spolID::cat</i> , <i>amyE::spolID(E88A)</i> ( <i>spec</i> )                                                                                                                                               | This work                   |
| BKM1905 | $\Delta$ <i>spolIQ::phleo</i> , <i>ycgO::P<sub>spolIQ</sub>-optRBS-gfp-spolIQ</i> ( <i>kan</i> ), $\Delta$ <i>spolIIAH::erm</i>                                                                                                                                                                                | This work                   |
| BKM1928 | $\Delta$ <i>spolIQ::phleo</i> , <i>ycgO::P<sub>spolIQ</sub>-optRBS-gfp-spolIQ</i> ( <i>kan</i> ), $\Delta$ <i>spolID::cat</i> , $\Delta$ <i>spolIP::tet</i>                                                                                                                                                    | This work                   |
| BKM1929 | $\Delta$ <i>spolIQ::phleo</i> , <i>ycgO::P<sub>spolIQ</sub>-optRBS-gfp-spolIQ</i> ( <i>kan</i> ), $\Delta$ <i>spolID::cat</i> , $\Delta$ <i>spolIIAH::erm</i>                                                                                                                                                  | This work                   |
| BKM1930 | $\Delta$ <i>spolIQ::phleo</i> , <i>ycgO::P<sub>spolIQ</sub>-optRBS-gfp-spolIQ</i> ( <i>kan</i> ), $\Delta$ <i>spolIGB::erm</i> ,                                                                                                                                                                               | This work                   |
| BCR12   | $\Delta$ <i>spolIQ::phleo</i> , <i>ycgO::P<sub>spolIQ</sub>-optRBS-gfp-spolIQ</i> ( <i>kan</i> ), $\Delta$ <i>spolID::cat</i> , $\Delta$ <i>spolIP::tet</i> , $\Delta$ <i>spolIIAH::erm</i> , <i>yhdG::spolID(E88A)</i> , <i>spolIP(E359A)</i> ( <i>spec</i> )                                                 | This work                   |
| BCR13   | $\Delta$ <i>spolIQ::phleo</i> , <i>P<sub>spolIQ</sub>-optRBS-gfp-spolIQ</i> ( <i>kan</i> ), $\Delta$ <i>spolID::cat</i> , $\Delta$ <i>spolIP::tet</i> , $\Delta$ <i>spolIIAH::erm</i> , <i>yhdG::spolID</i> , <i>spolIP</i> ( <i>spec</i> )                                                                    | This work                   |
| BCR24   | $\Delta$ <i>spolIQ::phleo</i> , <i>ycgO::P<sub>spolIQ</sub>-optRBS-gfp-spolIQ</i> ( <i>kan</i> ), <i>spolIIA::erm</i>                                                                                                                                                                                          | This work                   |
| BCR46   | $\Delta$ <i>spolIQ::phleo</i> , <i>ycgO::P<sub>spolIQ</sub>-optRBS-gfp-spolIQ</i> ( <i>tet</i> )                                                                                                                                                                                                               | This work                   |
| BCR70   | $\Delta$ <i>spolIQ::phleo</i> , <i>ycgO::P<sub>spolIQ</sub>-optRBS-gfp-spolIQ</i> ( <i>R208A</i> ) ( <i>kan</i> ), $\Delta$ <i>spolIIAH::erm</i>                                                                                                                                                               | This work                   |
| BCR71   | $\Delta$ <i>spolIQ::phleo</i> , <i>ycgO::P<sub>spolIQ</sub>-optRBS-gfp-spolIQ</i> ( <i>S164A</i> ) ( <i>kan</i> ), $\Delta$ <i>spolIIAH::erm</i>                                                                                                                                                               | This work                   |
| BCR72   | $\Delta$ <i>spolIQ::phleo</i> , <i>ycgO::P<sub>spolIQ</sub>-optRBS-gfp-spolIQ</i> ( <i>V166A</i> ) ( <i>kan</i> ), $\Delta$ <i>spolIIAH::erm</i>                                                                                                                                                               | This work                   |
| BCR76   | $\Delta$ <i>spolIQ::phleo</i> , <i>ycgO::P<sub>spolIQ</sub>-optRBS-gfp-spolIQ</i> ( <i>E206A</i> ) ( <i>kan</i> ), $\Delta$ <i>spolIIAH::erm</i>                                                                                                                                                               | This work                   |
| BCR77   | $\Delta$ <i>spolIQ::phleo</i> , <i>ycgO::P<sub>spolIQ</sub>-optRBS-gfp-spolIQ</i> ( <i>D123A</i> ) ( <i>kan</i> ), $\Delta$ <i>spolIIAH::erm</i>                                                                                                                                                               | This work                   |
| BCR78   | $\Delta$ <i>spolIQ::phleo</i> , <i>ycgO::P<sub>spolIQ</sub>-optRBS-gfp-spolIQ</i> ( <i>S119A</i> ) ( <i>kan</i> ), $\Delta$ <i>spolIIAH::erm</i>                                                                                                                                                               | This work                   |
| BCR79   | $\Delta$ <i>spolIQ::phleo</i> , <i>ycgO::P<sub>spolIQ</sub>-optRBS-gfp-spolIQ</i> ( <i>E156A</i> ) ( <i>kan</i> ), $\Delta$ <i>spolIIAH::erm</i>                                                                                                                                                               | This work                   |
| BCR80   | $\Delta$ <i>spolIQ::phleo</i> , <i>ycgO::P<sub>spolIQ</sub>-optRBS-gfp-spolIQ</i> ( <i>Q168A</i> ) ( <i>kan</i> ), $\Delta$ <i>spolIIAH::erm</i>                                                                                                                                                               | This work                   |
| BCR81   | $\Delta$ <i>spolIQ::phleo</i> , <i>ycgO::P<sub>spolIQ</sub>-optRBS-gfp-spolIQ</i> ( <i>H202A</i> ) ( <i>kan</i> ), $\Delta$ <i>spolIIAH::erm</i>                                                                                                                                                               | This work                   |
| BCR87   | $\Delta$ <i>spolIQ::phleo</i> , <i>ycgO::P<sub>spolIQ</sub>-optRBS-gfp-spolIQ</i> ( <i>Q168A</i> ) ( <i>kan</i> )                                                                                                                                                                                              | This work                   |
| BCR92   | <i>ycgO::P<sub>spolID</sub>-mYpet-spolID</i> ( <i>spec</i> )                                                                                                                                                                                                                                                   | This work                   |
| BCR100  | <i>ycgO::P<sub>spolID</sub>-mYpet-spolID</i> ( <i>spec</i> ), $\Delta$ <i>spolID::cat</i>                                                                                                                                                                                                                      | This work                   |
| BCR103  | <i>yhdG::P<sub>spolIP</sub>-mYpet-spolIP</i> ( <i>kan</i> )                                                                                                                                                                                                                                                    | This work                   |
| BCR110  | <i>yhdG::P<sub>spolIP</sub>-mYpet-spolIP</i> ( <i>kan</i> ), $\Delta$ <i>spolIP::tet</i>                                                                                                                                                                                                                       | This work                   |
| BCR121  | <i>yhdG::P<sub>spolIP</sub>-mYpet-spolIP</i> ( <i>E359A</i> ) ( <i>kan</i> ), $\Delta$ <i>spolIP::tet</i> , $\Delta$ <i>spolIIAH::erm</i> , <i>ycgO::spolID(E88A)</i> ( <i>spec</i> ), $\Delta$ <i>spolID::cat</i>                                                                                             | This work                   |
| BCR143  | <i>ycgO::P<sub>spolID</sub>-mYpet-spolID(E88A)</i> ( <i>spec</i> ), <i>yhdG::spolIP(E359A)</i> ( <i>kan</i> ), $\Delta$ <i>spolIP::tet</i> , $\Delta$ <i>spolID::cat</i> , $\Delta$ <i>spolIIAH::erm</i>                                                                                                       | This work                   |
| BCR151  | <i>yycR::P<sub>sspB</sub>-optRBS-cfp</i> ( <i>phleo</i> ), $\Delta$ <i>spolIQ::spec</i>                                                                                                                                                                                                                        | This work                   |
| BCR152  | <i>ycgO::spolIQ(Q168A)</i> ( <i>kan</i> ), $\Delta$ <i>spolIQ::phleo</i>                                                                                                                                                                                                                                       | This work                   |
| BCR153  | <i>ycgO::spolIQ(Q168A)</i> ( <i>kan</i> ), $\Delta$ <i>spolIIAH::erm</i> , $\Delta$ <i>spolIQ::phleo</i>                                                                                                                                                                                                       | This work                   |
| BCR161  | <i>ycgO::spolIQ</i> ( <i>kan</i> ), $\Delta$ <i>spolIIAH::erm</i> , $\Delta$ <i>spolIQ::phleo</i>                                                                                                                                                                                                              | This work                   |
| BCR162  | <i>ycgO::spolIQ</i> ( <i>kan</i> ), $\Delta$ <i>spolIB::erm</i> , $\Delta$ <i>spolIQ::phleo</i>                                                                                                                                                                                                                | This work                   |
| BCR163  | <i>ycgO::spolIQ</i> ( <i>kan</i> ), $\Delta$ <i>spolIQ::phleo</i>                                                                                                                                                                                                                                              | This work                   |
| BCR185  | <i>yycR::P<sub>sspB</sub>-optRBS-cfp</i> ( <i>phleo</i> ), $\Delta$ <i>spolIQ::spec</i> , <i>ycgO::spolIQ(Q168A)</i> ( <i>kan</i> )                                                                                                                                                                            | This work                   |
| BCR186  | <i>yycR::P<sub>sspB</sub>-optRBS-cfp</i> ( <i>phleo</i> ), $\Delta$ <i>spolIQ::spec</i> , <i>ycgO::spolIQ</i> ( <i>kan</i> )                                                                                                                                                                                   | This work                   |
| BCR188  | $\Delta$ <i>spolIP::tet</i> $\Omega$ <i>P<sub>spolIP</sub>-gfp-spolIP</i> ( <i>erm</i> ), <i>ycgO::P<sub>spolIQ</sub>-optRBS-mCherry-spolIQ</i> ( <i>cat</i> ), $\Delta$ <i>spolIQ::phleo</i>                                                                                                                  | This work                   |
| BCR190  | $\Delta$ <i>spolID::kan</i> $\Omega$ <i>P<sub>spolID</sub>-gfp-spolID</i> ( <i>erm</i> ), <i>ycgO::P<sub>spolIQ</sub>-optRBS-mCherry-spolIQ</i> ( <i>cat</i> ), $\Delta$ <i>spolIQ::phleo</i>                                                                                                                  | This work                   |
| BCR191  | <i>yycR::P<sub>sspB</sub>-optRBS-cfp</i> ( <i>phleo</i> ), $\Delta$ <i>spolIQ::spec</i> , <i>ycgO::spolIQ(Q168A)</i> ( <i>kan</i> ), $\Delta$ <i>spolIIAH::erm</i>                                                                                                                                             | This work                   |
| BCR193  | <i>yycR::P<sub>sspB</sub>-optRBS-cfp</i> ( <i>phleo</i> ), $\Delta$ <i>spolIQ::spec</i> , <i>ycgO::spolIQ</i> ( <i>kan</i> ), $\Delta$ <i>spolIIAH::erm</i>                                                                                                                                                    | This work                   |
| BCR196  | <i>ycgO::spolIQ(Q168A)</i> ( <i>kan</i> ), $\Delta$ <i>spolIQ::phleo</i> , $\Delta$ <i>spolIB::erm</i> ,                                                                                                                                                                                                       | This work                   |
| BCR299  | $\Delta$ <i>spolIGB::erm</i> , $\Delta$ <i>spolIQ::tet</i> , <i>ycgO::P<sub>spolIQ</sub>-optRBS-gfp-spolIQ</i> ( <i>kan</i> ), <i>pelB::hyperspank-optRBS-spolID</i> ( <i>cat</i> ), <i>yrvN::P<sub>hyperspank</sub>-optRBS-spolIM</i> ( <i>spec</i> ), <i>ykoW::hyperspank-optRBS-spolIP</i> ( <i>phleo</i> ) | This work                   |
| BCR527  | <i>yycR::P<sub>sspE</sub>-optRBS-cfp</i> ( <i>phleo</i> ), $\Delta$ <i>spolIP::tet</i>                                                                                                                                                                                                                         | This work                   |
| BCR529  | <i>yycR::P<sub>sspE</sub>-optRBS-cfp</i> ( <i>phleo</i> ), $\Delta$ <i>spolID::cat</i> , $\Delta$ <i>spolIP::tet</i>                                                                                                                                                                                           | This work                   |

**TABLE S3:** Plasmids used in this study

| plasmids | description                                                                                | source    |
|----------|--------------------------------------------------------------------------------------------|-----------|
| pKM392   | <i>ycgO</i> :: <i>P<sub>spoIIQ</sub></i> -optRBS-gfp- <i>spoIIQ</i> (kan)                  | This work |
| pKM399   | <i>yhdG</i> :: <i>spoIIP</i> , <i>spoIID</i> (spec)                                        | This work |
| pLW003   | <i>yhdG</i> :: <i>spoIIP</i> <sup>E359A</sup> , <i>spoIID</i> <sup>E88A</sup> (spec)       | This work |
| pCR009   | <i>ycgO</i> :: <i>P<sub>spoIIQ</sub></i> -optRBS-gfp- <i>spoIIQ</i> <sup>R208A</sup> (kan) | This work |
| pCR010   | <i>ycgO</i> :: <i>P<sub>spoIIQ</sub></i> -optRBS-gfp- <i>spoIIQ</i> <sup>S164A</sup> (kan) | This work |
| pCR011   | <i>ycgO</i> :: <i>P<sub>spoIIQ</sub></i> -optRBS-gfp- <i>spoIIQ</i> <sup>V166A</sup> (kan) | This work |
| pCR015   | <i>ycgO</i> :: <i>P<sub>spoIIQ</sub></i> -optRBS-gfp- <i>spoIIQ</i> <sup>E206A</sup> (kan) | This work |
| pCR016   | <i>ycgO</i> :: <i>P<sub>spoIIQ</sub></i> -optRBS-gfp- <i>spoIIQ</i> <sup>D123A</sup> (kan) | This work |
| pCR017   | <i>ycgO</i> :: <i>P<sub>spoIIQ</sub></i> -optRBS-gfp- <i>spoIIQ</i> <sup>S119A</sup> (kan) | This work |
| pCR018   | <i>ycgO</i> :: <i>P<sub>spoIIQ</sub></i> -optRBS-gfp- <i>spoIIQ</i> <sup>E156A</sup> (kan) | This work |
| pCR019   | <i>ycgO</i> :: <i>P<sub>spoIIQ</sub></i> -optRBS-gfp- <i>spoIIQ</i> <sup>Q686A</sup> (kan) | This work |
| pCR020   | <i>ycgO</i> :: <i>P<sub>spoIIQ</sub></i> -optRBS-gfp- <i>spoIIQ</i> <sup>H202A</sup> (kan) | This work |
| pCR026   | <i>ycgO</i> :: <i>P<sub>spoIID</sub></i> -mYpet- <i>spoIID</i> (spec)                      | This work |
| pCR027   | <i>ycgO</i> :: <i>P<sub>spoIID</sub></i> -mYpet- <i>spoIID</i> <sup>E88A</sup> (spec)      | This work |
| pCR028   | <i>yhdG</i> :: <i>P<sub>spoIIP</sub></i> -mYpet- <i>spoIIP</i> <sup>E359A</sup> (kan)      | This work |
| pCR029   | <i>yhdG</i> :: <i>spoIIP</i> <sup>E359A</sup> (kan)                                        | This work |
| pCR030   | <i>ycgO</i> :: <i>spoIID</i> <sup>E88A</sup> (spec)                                        | This work |
| pCR035   | <i>His-SUMO-sfGFP-spoIIQ</i> <sup>ECD</sup>                                                | This work |
| pCR037   | <i>ycgO</i> :: <i>spoIIQ</i> <sup>Q168A</sup> (kan)                                        | This work |
| pCR041   | <i>ycgO</i> :: <i>P<sub>spoIIQ</sub></i> -optRBS-mCherry(B.s.)- <i>spoIIQ</i> (cat)        | This work |
| pCR046   | <i>yvrN</i> :: <i>P<sub>hyperspank</sub></i> (spec)                                        | This work |
| pCR047   | <i>peIB</i> :: <i>P<sub>hyperspank</sub></i> -optRBS- <i>spoIID</i> (cat)                  | This work |
| pCR050   | <i>His-SUMO-sfGFP-spoIIQ</i> <sup>ECD (H202AH204A)</sup>                                   | This work |
| pCR052   | <i>ykoW</i> :: <i>P<sub>hyperspank</sub></i> -optRBS- <i>spoIIP</i> (phleo)                | This work |
| pTU130   | <i>His-SUMO-sfGFP-envC</i> <sup>35-419</sup>                                               | T. Uehara |

**TABLE S4:** Oligonucleotide primers used in this study

| primer  | sequence*                                             |
|---------|-------------------------------------------------------|
| oCR0029 | ccacgtgcactttgaaatcgctaagaatggggttgcaatgaa            |
| oCR0030 | gagattgatacacagtcgctaaccgctcgcatgttcta                |
| oCR0031 | ccgacggtttatcgactgcgtatcaatctcttcgaagtaag             |
| oCR0033 | gaaaccacgtgcactttgcaatccgtaaagaatggggttg              |
| oCR0034 | gcctaagcaaaggaattgccttagctgagaaagcggaa                |
| oCR0035 | ctataataacacgtacagcctagccaaaggaattgacttagctg          |
| oCR0036 | gtgctgggatagtgtggcagtagaacatgccgacggtt                |
| oCR0037 | ggtttatcgactgtgatgcatctcttccgaagtaagcg                |
| oCR0040 | cgcGAATTCgggcacaacttaattggttac                        |
| oCR0041 | caagcgtggaggattcaatgtcaaaaggcgaagagctg                |
| oCR0042 | cagctcttcgctttgacattgaatccctccagcgttg                 |
| oCR0044 | gccgctagagcctgatccctgtaaagttcattcatccc                |
| oCR0045 | cgagcaggaggcagctgaatgtcaaaaggcgaagagctg               |
| oCR0046 | cagctcttcgctttgacatattcagctgcctcctgctcg               |
| oCR0047 | ggatcaggctctagcggcatgaaacaattcgcaatcacac              |
| oCR0059 | ggcGGATCCagccaatcagatcaaatgatgagg                     |
| oCR0060 | gccAAGCTTTtaagactgtcagtgcttc                          |
| oCR0061 | caccatctttatcgtgagaagaattcgaccttagcttgag              |
| oCR0062 | gaaatcgccattcgccaggggatcctaactcacattaattgcttgc        |
| oCR0073 | ggcAAGCTTAcataaggagggaactactatggtcagcaaggagagg        |
| oCR0074 | cggCTCGAGTttgtataattcgccattccacc                      |
| oCR0075 | ggcggCCCGGGacataaggagggaactactatgaaacaattcgcaatcacac  |
| oCR0076 | ggcgcGCATGCcgacaaatgtggatgactttac                     |
| oCR0078 | ggcgcGCTAGCctagcttagattatcaatagg                      |
| oCR0082 | tagttcctctatgtcccgggacaagcctaattgttatccgctcac         |
| oCR0087 | cggacaggatccggttaag                                   |
| oCR0088 | agttggaactctgcggttagctcgcatgcaagctaattcggttg          |
| oCR0089 | ataggggtgagtggttcc                                    |
| oCR0090 | cccgggacataaggagggaactactatgcaaaaatctctataaggac       |
| oCR0091 | gctagccgagaggtccaactata                               |
| oCR0094 | cgcAAGCTTAcataaggagggaactactatgatgagaataaacgcagaaacag |
| oDR0065 | ggcGAATTCgccgctctggcgcgagac                           |
| oDR0320 | acagtgaagacagcggaaacgccgtgcactttgaaatccgtaa           |
| oDR0728 | cgcGGATCCgacaaatgtggatgactttacc                       |
| oDR0734 | gattggagtcgtgcctccgcaatgccggcaacctttaaacc             |
| oDR0810 | gccGCTAGCgacaaatgtggatgactttacc                       |
| oDR0811 | ccgGCTAGCacaacttaattggttacaccg                        |
| oDR0812 | cgcGGATCCactagcttagattatcaatagg                       |
| oDR0821 | gatagagcgctttgctcgcatggcggagtggaataat                 |

\* capital letters indicate the recognition sites of restriction enzymes
